# Supplementary material for: Comparative study on drug encapsulation and release kinetics in extracellular vesicles loaded with snake venom L - amino acid oxidase
Source: BMC Pharmacol Toxicol. 2025 May 8;26:98. doi: 10.1186/s40360-025-00938-8 (PMC12063349; doi:10.1186/s40360-025-00938-8)
Supplement: Supplementary file 1 — Supplementary Material 1 [file 40360_2025_938_MOESM1_ESM.xlsx]

## Sheet: Sheet1
				Incubation at room temperature-30mins
				Sample Conc.	Abs278	Value (graph)	Dilution factor	Final Value	EE(%)	MEAN	STDEV	CV	*100			EE(%)
			1	1000(S1)	0.714	366.421	2	732.842	26.7158	26.6807	0.0607737	0.00227782	0.227782			26.71
				1000(S2)	0.714	366.421	2	732.842	26.7158							26.71
				1000(S3)	0.715	366.947	2	733.895	26.6105							26.61
			2	500(S1)	0.432	218	2	436	12.8	12.7298	0.121547	0.00954824	0.954824			12.8
				500(S2)	0.432	218	2	436	12.8							12.8
				500(S3)	0.433	218.526	2	437.053	12.5895							12.58
			3	250(S1)	0.244	119.053	2	238.105	4.75789	4.61754	0.243095	0.0526459	5.26459			4.75
				250(S2)	0.244	119.053	2	238.105	4.75789							4.75
				250(S3)	0.245	119.579	2	239.158	4.33684							4.33
				Incubation at room temperature-60mins
				Sample	Abs278	Value (graph)	Dilution factor	Final Value	EE(%)	MEAN	STDEV	CV	*100			EE(%)
			1	1000(S1)	0.416	209.579	2	419.158	58.0842	58.1544	0.0607737	0.00104504	0.104504			58.08
			2	1000(S2)	0.415	209.053	2	418.105	58.1895							58.18
			3	1000(S3)	0.415	209.053	2	418.105	58.1895							58.18
			1	500(S1)	0.331	164.842	2	329.684	34.0632	34.2035	0.121547	0.00355365	0.355365			34.06
			2	500(S2)	0.33	164.316	2	328.632	34.2737							34.27
			3	500(S3)	0.33	164.316	2	328.632	34.2737							34.27
			1	250(S1)	0.208	100.105	2	200.211	19.9158	19.6351	0.243095	0.0123806	1.23806			19.91
			2	250(S2)	0.209	100.632	2	201.263	19.4947							19.49
			3	250(S3)	0.209	100.632	2	201.263	19.4947							19.49
				Freeze thaw cycle
				Sample	Abs278	Value (graph)	Dilution factor	Final Value	EE(%)	MEAN	STDEV	CV	*100
				1000(S1)	0.438	221.158	2	442.316	55.7684	55.8035	0.0607737	0.00108907	0.108907
				1000(S2)	0.438	221.158	2	442.316	55.7684
				1000(S3)	0.437	220.632	2	441.263	55.8737
				500(S1)	0.292	144.316	2	288.632	42.2737	42.2737	0	0	0
				500(S2)	0.292	144.316	2	288.632	42.2737
				500(S3)	0.292	144.316	2	288.632	42.2737
				250(S1)	0.187	89.0526	2	178.105	28.7579	28.7579	0	0	0
				250(S2)	0.187	89.0526	2	178.105	28.7579
				250(S3)	0.187	89.0526	2	178.105	28.7579
					1000	26.68
					500	12.72
					250	4.61
