# Supplementary material for: Comparative study on drug encapsulation and release kinetics in extracellular vesicles loaded with snake venom L - amino acid oxidase
Source: BMC Pharmacol Toxicol. 2025 May 8;26:98. doi: 10.1186/s40360-025-00938-8 (PMC12063349; doi:10.1186/s40360-025-00938-8)
Supplement: Supplementary file 2 — Supplementary Material 2 [file 40360_2025_938_MOESM2_ESM.xlsx]

## Sheet: Sheet1
						FOR PURE DRUG RELEASE
	Time(in mins)	Abs	AV ABS	standad devaitn	cv	*100
	0	0.0541	0.0541	5.7735e-05	0.00106719	0.106719
		0.0541
		0.0542
	30	0.0552	0.0552	5.7735e-05	0.00104592	0.104592
		0.0553
		0.0553
	60	0.0581	0.0581	0.00011547	0.00198744	0.198744
		0.0583
		0.0581
	90	0.0611	0.0611	0.0001	0.00163666	0.163666
		0.061
		0.0612
	120	0.0641	0.0641	0.0001	0.00156006	0.156006
		0.064
		0.0642
	150	0.0662	0.0662	5.7735e-05	0.00087213	0.087213
		0.0663
		0.0663
	180	0.0674	0.0674	0.00011547	0.00171321	0.171321
		0.0676
		0.0674
	210	0.0691	0.0691	0.000152753	0.0022106	0.22106
		0.069
		0.0693
	240	0.0705	0.0705	0.000173205	0.00245681	0.245681
		0.0702
		0.0705
	270	0.0737	0.0737	5.7735e-05	0.000783379	0.0783379
		0.0738
		0.0737
	300	0.0749	0.0749	0.0001	0.00133511	0.133511
		0.0748
		0.075
	330	0.0775	0.0775	0.0001	0.00129032	0.129032
		0.0776
		0.0774

## Sheet: Sheet2
			PURE DRUG RELEASE (% RELEASE CALCULATION)
			Time	Absorbance	abs-blank	concentration	mg	in 20ml	Cumu	release	*100
			0 mins	0.0541	0.0231	0.0555556	5.55556e-05	0.00138889	0.00138889	0.000694444	0.0694444
			30mins	0.0552	0.0242	0.666667	0.000666667	0.0166667	0.0180556	0.00902778	0.902778
			60mins	0.0581	0.0271	2.27778	0.00227778	0.0569444	0.075	0.0375	3.75
			90mins	0.0611	0.0301	3.94444	0.00394444	0.0986111	0.173611	0.0868056	8.68056
			120mins	0.0641	0.0331	5.61111	0.00561111	0.140278	0.313889	0.156944	15.6944
			150mins	0.0662	0.0352	6.77778	0.00677778	0.169444	0.483333	0.241667	24.1667
			180mins	0.0674	0.0364	7.44444	0.00744444	0.186111	0.669444	0.334722	33.4722
			210mins	0.0691	0.0381	8.38889	0.00838889	0.209722	0.879167	0.439583	43.9583
			240mins	0.0705	0.0395	9.16667	0.00916667	0.229167	1.10833	0.554167	55.4167
			270mins	0.0737	0.0427	10.9444	0.0109444	0.273611	1.38194	0.690972	69.0972
			300mins	0.0749	0.0439	11.6111	0.0116111	0.290278	1.67222	0.836111	83.6111
			330mins	0.0775	0.0465	13.0556	0.0130556	0.326389	1.99861	0.999306	99.9306
			360mins	0.0267	-0.0043	-15.1667	-0.0151667	-0.379167	1.61944	0.809722	80.9722
			Time(in minutes)	Percentage
			0	0.0694
			30	0.9027
			60	3.75
			90	8.6805
			120	15.694
			150	24.166
			180	33.472
			210	43.958
			240	55.416
			270	69.097
			300	83.6
			330	99.93
				Time(in minutes)	Percentage
				0	0.069±0.0001
				30	0.90±0.0001
				60	3.75±0.0001
				90	8.68±0.0001
				120	15.69±0.0001
				150	24.16±0.0001
				180	33.47±0.0001
				210	43.95±0.0001
				240	55.41±0.0001
				270	69.09±0.0001
				300	83.61±0.0001
				330	99.93±0.0001

## Sheet: Sheet3
					DRUG RELEASE STUDY OF EV LOADED LAAO
			Time(mins)	Abs	average	stdev	cv	%cv
			0	0.053	0.0530333	5.7735e-05	0.00108866	0.108866
				0.0531
				0.053
			30	0.0534	0.0534	0.0001	0.00187266	0.187266
				0.0533
				0.0535
			60	0.0455	0.0455	0.0002	0.0043956	0.43956
				0.0453
				0.0457
			90	0.0457	0.0457	0.0002	0.00437637	0.437637
				0.0455
				0.0459
			120	0.0468	0.0468	0.0005	0.0106838	1.06838
				0.0463
				0.0473
			150	0.0473	0.0473	0.0003	0.00634249	0.634249
				0.047
				0.0476
			180	0.0479	0.0479333	5.7735e-05	0.00120449	0.120449
				0.0479
				0.048
			210	0.048	0.0481	0.000173205	0.00360094	0.360094
				0.048
				0.0483
			240	0.0489	0.0489333	0.000351188	0.00717688	0.717688
				0.0486
				0.0493
			270	0.0507	0.0506667	0.000351188	0.00693135	0.693135
				0.0503
				0.051
			300	0.0517	0.0517	0.0003	0.00580271	0.580271
				0.0514
				0.052
			330	0.0554	0.0554333	0.000351188	0.00633533	0.633533
				0.0551
				0.0558
			360	0.0562	0.0562	0.0004	0.00711744	0.711744
				0.0558
				0.0566
			390	0.0517	0.0517333	0.000450925	0.00871633	0.871633
				0.0513
				0.0522
			420	0.0523	0.0523	0.0002	0.00382409	0.382409
				0.0521
				0.0525
			450	0.0531	0.0531	0.0003	0.00564972	0.564972
				0.0528
				0.0534
			480	0.0621	0.0620667	0.000450925	0.00726517	0.726517
				0.0616
				0.0625
			510	0.0635	0.0635333	0.000550757	0.00866879	0.866879
				0.063
				0.0641

## Sheet: Sheet4
						DRUG RELEASE STUDY OF EV LOADED LAAO(incubation)
					Time(in minutes)	Abs	Abs-blank	Conc(ug)	conc(mg)	in 20ml	cumulative	Release	Release%
					0	0.053	0.0325	4.77778	0.00477778	0.119444	0.119444	0.0597222	5.97222
					30	0.0534	0.0329	5	0.005	0.125	0.244444	0.122222	12.2222
					60	0.0455	0.025	0.611111	0.000611111	0.0152778	0.259722	0.129861	12.9861
					90	0.0457	0.0252	0.722222	0.000722222	0.0180556	0.277778	0.138889	13.8889
					120	0.0468	0.0263	1.33333	0.00133333	0.0333333	0.311111	0.155556	15.5556
					150	0.0473	0.0268	1.61111	0.00161111	0.0402778	0.351389	0.175694	17.5694
					180	0.0479	0.0274	1.94444	0.00194444	0.0486111	0.4	0.2	20
					210	0.048	0.0275	2	0.002	0.05	0.45	0.225	22.5
					240	0.0489	0.0284	2.5	0.0025	0.0625	0.5125	0.25625	25.625
					270	0.0507	0.0302	3.5	0.0035	0.0875	0.6	0.3	30
					300	0.0517	0.0312	4.05556	0.00405556	0.101389	0.701389	0.350694	35.0694
					330	0.0554	0.0349	6.11111	0.00611111	0.152778	0.854167	0.427083	42.7083
					360	0.05628	0.03578	6.6	0.0066	0.165	1.01917	0.509583	50.9583
					390	0.0517	0.0312	4.05556	0.00405556	0.101389	1.12056	0.560278	56.0278
					420	0.0523	0.0318	4.38889	0.00438889	0.109722	1.23028	0.615139	61.5139
					450	0.0531	0.0326	4.83333	0.00483333	0.120833	1.35111	0.675556	67.5556
					480	0.0621	0.0416	9.83333	0.00983333	0.245833	1.59694	0.798472	79.8472
					510	0.0635	0.043	10.6111	0.0106111	0.265278	1.86222	0.931111	93.1111
				Time(mins)	Release%
				0	5.972
				30	12.222
				60	12.986
				90	13.88
				120	15.555
				150	17.569
				180	20
				210	22.5
				240	25.625
				270	30
				300	35.069
				330	42.708
				360	50.958
				390	56.027
				420	61.513
				450	67.55
				480	79.847
				520	93.11
				Time	Release%
				0	5.97±0.0001
				30	12.22±0.0001
				60	12.98±0.0001
				90	13.88±0.0001
				120	15.55±0.0001
				150	17.56±0.0001
				180	20.00±0.0001
				210	22.50±0.0001
				240	25.62+0.0001
				270	30.00±0.0001
				300	35.06±0.0001
				330	42.70±0.0001
				360	50.95±0.0001
				390	56.02±0.0001
				420	61.51±0.0001
				450	67.55±0.0001
				480	79.84±0.0001
				510	93.11±0.0001

## Sheet: Sheet5
			Drug release for Freeze thaw
						ABS	AV ABS	STDEV	CV	%CV
					0	0.055	0.0550333	5.7735e-05	0.00104909	0.104909
						0.0551
						0.055
					30	0.032	0.0326667	0.0011547	0.035348	3.5348
						0.032
						0.034
					60	0.0323	0.0323	0.0001	0.00309598	0.309598
						0.0322
						0.0324
					90	0.0327	0.0327333	5.7735e-05	0.0017638	0.17638
						0.0327
						0.0328
					120	0.0331	0.0331667	0.00011547	0.00348151	0.348151
						0.0333
						0.0331
					150	0.0334	0.0334667	0.00011547	0.0034503	0.34503
						0.0336
						0.0334
					180	0.0339	0.0339	0.0001	0.00294985	0.294985
						0.0338
						0.034
					210	0.0404	0.0404667	0.00011547	0.00285346	0.285346
						0.0406
						0.0404
					240	0.0409	0.0409667	0.00011547	0.00281863	0.281863
						0.0411
						0.0409
					270	0.0411	0.0411333	5.7735e-05	0.00140361	0.140361
						0.0412
						0.0411
					300	0.0416	0.0416333	5.7735e-05	0.00138675	0.138675
						0.0417
						0.0416
					330	0.042	0.0420333	5.7735e-05	0.00137355	0.137355
						0.042
						0.0421
					360	0.0423	0.0423	0.0001	0.00236407	0.236407
						0.0422
						0.0424

## Sheet: Sheet6
						ABS	ABS-BLANK	CON(ug)	in mg conc	in 20ml	cumu	release	%
					0	0.055	0.0231	0.0555556	5.55556e-05	0.00111111	0.00111111	0.000555556	0.0555556
					30	0.032	0.032	5	0.005	0.1	0.101111	0.0505556	5.05556
					60	0.0323	0.0323	5.16667	0.00516667	0.103333	0.204444	0.102222	10.2222
					90	0.0327	0.0327	5.38889	0.00538889	0.107778	0.312222	0.156111	15.6111
					120	0.0331	0.0331	5.61111	0.00561111	0.112222	0.424444	0.212222	21.2222
					150	0.0334	0.0334	5.77778	0.00577778	0.115556	0.54	0.27	27
					180	0.0339	0.0339	6.05556	0.00605556	0.121111	0.661111	0.330556	33.0556
					210	0.0404	0.0404	9.66667	0.00966667	0.193333	0.854444	0.427222	42.7222
					240	0.0409	0.0409	9.94444	0.00994444	0.198889	1.05333	0.526667	52.6667
					270	0.0411	0.0411	10.0556	0.0100556	0.201111	1.25444	0.627222	62.7222
					300	0.0416	0.0416	10.3333	0.0103333	0.206667	1.46111	0.730556	73.0556
					330	0.042	0.042	10.5556	0.0105556	0.211111	1.67222	0.836111	83.6111
					360	0.0423	0.0423	10.7222	0.0107222	0.214444	1.88667	0.943333	94.3333
					390	0.0329	0.0329	5.5	0.0055	0.11	1.99667	0.998333	99.8333
					420	0.0337	0.0337	5.94444	0.00594444	0.118889	2.11556	1.05778	105.778
					450	0.0447	0.0447	12.0556	0.0120556	0.241111	2.35667	1.17833	117.833
					480	0.0468	0.0468	13.2222	0.0132222	0.264444	2.62111	1.31056	131.056
					510	0.0411	0.0411	10.0556	0.0100556	0.201111	2.82222	1.41111	141.111
					540	0.0518	0.0518	16	0.016	0.32	3.14222	1.57111	157.111
					570	0.0454	0.0454	12.4444	0.0124444	0.248889	3.39111	1.69556	169.556
					600	0.0435	0.0435	11.3889	0.0113889	0.227778	3.61889	1.80944	180.944
					TIME	RELEASE%
					0	0.0555556
					30	5.05556
					60	10.2222
					90	15.6111
					120	21.2222
					150	27
					180	33.0556
					210	42.7222
					240	52.6667
					270	62.7222
					300	73.0556
					330	83.6111
					360	94.3333
					390	99.8333
						TIME	RELEASE%
						0	0.055±0.0001
						30	5.05±0.0001
						60	10.22±0.0001
						90	15.61±0.0001
						120	21.22±0.0001
						150	27±0.0001
						180	33.05±0.0001
						210	42.72±0.0001
						240	52.66±0.0001
						270	62.72±0.0001
						300	73.05±0.0001
						330	83.61±0.0001
						360	94.33±0.0001
						390	99.83±0.0001
